# Supplementary material
Source: Springer Nature journal article supplement (https://www.springermedizin.de/resource/supplementary/12955_2012_1159_MOESM1_ESM.pdf/9559402)
Supplement: MOESM1 [file 9559402]

PHPT patient

Psychological symptoms: anxiety, depression, mood swings, loss of concentration

Physical symptoms: fatigue, insomnia, polyuria, abdominal pain, sickness

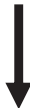

Psychologic  
al Domain

Social  
Domain

Daily  
Activities  
Domain

Physical  
Domain

Vitality and  
Energy  
Domain

Emotional  
Wellbeing

Social  
wellbeing

Phisical  
wellbeing

HRQoL in PHP patients
